# Supplementary material
Source: MDPI journal article supplement (https://www.mdpi.com/2073-4336/9/2/23)
Supplement: s1 [file s1]

Archive with 13 entries (11 files):
- supfile final/
- supfile final/supfile/
- supfile final/supfile/hl_screen_engl-eps-converted-to.pdf
- supfile final/supfile/logo-mdpi-eps-converted-to.pdf
- supfile final/supfile/logo-mdpi.eps
- supfile final/supfile/mdpi.bst
- supfile final/supfile/mdpi.cls
- supfile final/supfile/supfile-games.aux
- supfile final/supfile/supfile-games.log
- supfile final/supfile/supfile-games.out
- supfile final/supfile/supfile-games.pdf
- supfile final/supfile/supfile-games.synctex.gz
- supfile final/supfile/supfile-games.tex
