# Supplementary material
Source: MDPI journal article supplement (https://www.mdpi.com/2073-4336/9/2/23)
Supplement: s1 [file s1]

| No. | Option A                                                                     | Decision                                                      | Option B                                                                     |
|-----|------------------------------------------------------------------------------|---------------------------------------------------------------|------------------------------------------------------------------------------|
| 1.  | EUR 2.00 with a probability of 10% or<br>EUR 1.60 with a probability of 90%. | Option A <input type="radio"/> <input type="radio"/> Option B | EUR 3.85 with a probability of 10% or<br>EUR 0.10 with a probability of 90%. |
| 2.  | EUR 2.00 with a probability of 20% or<br>EUR 1.60 with a probability of 80%. | Option A <input type="radio"/> <input type="radio"/> Option B | EUR 3.85 with a probability of 20% or<br>EUR 0.10 with a probability of 80%. |
| 3.  | EUR 2.00 with a probability of 30% or<br>EUR 1.60 with a probability of 70%. | Option A <input type="radio"/> <input type="radio"/> Option B | EUR 3.85 with a probability of 30% or<br>EUR 0.10 with a probability of 70%. |
| 4.  | EUR 2.00 with a probability of 40% or<br>EUR 1.60 with a probability of 60%. | Option A <input type="radio"/> <input type="radio"/> Option B | EUR 3.85 with a probability of 40% or<br>EUR 0.10 with a probability of 60%. |
| 5.  | EUR 2.00 with a probability of 50% or<br>EUR 1.60 with a probability of 50%. | Option A <input type="radio"/> <input type="radio"/> Option B | EUR 3.85 with a probability of 50% or<br>EUR 0.10 with a probability of 50%. |
| 6.  | EUR 2.00 with a probability of 60% or<br>EUR 1.60 with a probability of 40%. | Option A <input type="radio"/> <input type="radio"/> Option B | EUR 3.85 with a probability of 60% or<br>EUR 0.10 with a probability of 40%. |
| 7.  | EUR 2.00 with a probability of 70% or<br>EUR 1.60 with a probability of 30%. | Option A <input type="radio"/> <input type="radio"/> Option B | EUR 3.85 with a probability of 70% or<br>EUR 0.10 with a probability of 30%. |
| 8.  | EUR 2.00 with a probability of 80% or<br>EUR 1.60 with a probability of 20%. | Option A <input type="radio"/> <input type="radio"/> Option B | EUR 3.85 with a probability of 80% or<br>EUR 0.10 with a probability of 20%. |
| 9.  | EUR 2.00 with a probability of 90% or<br>EUR 1.60 with a probability of 10%. | Option A <input type="radio"/> <input type="radio"/> Option B | EUR 3.85 with a probability of 90% or<br>EUR 0.10 with a probability of 10%. |
| 10. | EUR 2.00 with a probability of 100% or<br>EUR 1.60 with a probability of 0%. | Option A <input type="radio"/> <input type="radio"/> Option B | EUR 3.85 with a probability of 100% or<br>EUR 0.10 with a probability of 0%. |
