# Supplementary material
Source: MDPI journal article supplement (https://www.mdpi.com/2073-4336/9/2/23)
Supplement: s1 [file s1 › supfile final/supfile/supfile-games.aux]

\relax 
\providecommand\hyper@newdestlabel[2]{}
\bibstyle{mdpi}
\providecommand\HyperFirstAtBeginDocument{\AtBeginDocument}
\HyperFirstAtBeginDocument{\ifx\hyper@anchor\@undefined
\global\let\oldcontentsline\contentsline
\gdef\contentsline#1#2#3#4{\oldcontentsline{#1}{#2}{#3}}
\global\let\oldnewlabel\newlabel
\gdef\newlabel#1#2{\newlabelxx{#1}#2}
\gdef\newlabelxx#1#2#3#4#5#6{\oldnewlabel{#1}{{#2}{#3}}}
\AtEndDocument{\ifx\hyper@anchor\@undefined
\let\contentsline\oldcontentsline
\let\newlabel\oldnewlabel
\fi}
\fi}
\global\let\hyper@last\relax 
\gdef\HyperFirstAtBeginDocument#1{#1}
\providecommand\HyField@AuxAddToFields[1]{}
\providecommand\HyField@AuxAddToCoFields[2]{}
\newlabel{sec:instr}{{}{1}{}{Doc-Start}{}}
\@writefile{lot}{\contentsline {table}{\numberline {S1}{\ignorespaces Productivities in the three labor markets.\relax }}{3}{table.1}}
\@writefile{lot}{\contentsline {table}{\numberline {S2}{\ignorespaces Profit calculation.\relax }}{3}{table.2}}
\newlabel{LastPage}{{}{4}{}{page.4}{}}
\xdef\lastpage@lastpage{4}
\xdef\lastpage@lastpageHy{4}
