# Supplementary material
Source: MDPI journal article supplement (https://www.mdpi.com/2073-4336/9/2/23)
Supplement: s1 [file s1 › supfile final/supfile/supfile-games.tex]

% !TeX spellcheck = en_US
\documentclass[games,supfile,accept,oneauthor,pdftex,10pt,a4paper]{mdpi}
\usepackage{mathtools}
%\usepackage[utf8]{inputenc}
%=================================================================
\firstpage{1} 
\makeatletter 
\setcounter{page}{\@firstpage} 
\makeatother
\pubvolume{xx}
\issuenum{1}
\articlenumber{1}
\pubyear{2018}
\copyrightyear{2018}
%\externaleditor{Academic Editor: name}
\history{Received: date; Accepted: date; Published: date}

%\updates{yes} % If there is an update available, un-comment this line

%------------------------------------------------------------------
% The following line should be uncommented if the LaTeX file is uploaded to arXiv.org
%\pdfoutput=1

%=================================================================
% Add packages and commands here. The following packages are loaded in our class file: fontenc, calc, indentfirst, fancyhdr, graphicx, lastpage, ifthen, lineno, float, amsmath, setspace, enumitem, mathpazo, booktabs, titlesec, etoolbox, amsthm, hyphenat, natbib, hyperref, footmisc, geometry, caption, url, mdframed, tabto, soul, multirow, microtype, tikz, siunitx

%=================================================================
%% Please use the following mathematics environments: Theorem, Lemma, Corollary, Proposition, Characterization, Property, Problem, Example, ExamplesandDefinitions, Hypothesis, Remark, Definition
%% For proofs, please use the proof environment (the amsthm package is loaded by the MDPI class).

%=================================================================
% Full title of the paper (Capitalized)
\Title{Voluntary Disclosure of Private Information and Unraveling in the Market for Lemons: An Experiment}

% Author Orchid ID: enter ID or remove command
%\newcommand{\orcidauthorA}{0000-0000-000-000X} % Add \orcidA{} behind the author's name
%\newcommand{\orcidauthorB}{0000-0000-000-000X} % Add \orcidB{} behind the author's name

% Authors, for the paper (add full first names)
%\Author{Volker Benndorf $^{1}$}
\Author{}
% Authors, for metadata in PDF
%\AuthorNames{Volker Benndorf}

% Affiliations / Addresses (Add [1] after \address if there is only one affiliation.)
%\address{%
%	$^{1}$ \quad Goethe-Universität Frankfurt, Theodor-W.-Adorno-Platz 4, HPF 84, 60629 Frankfurt; benndorf@econ.uni-frankfurt.de}
\address{}
% Contact information of the corresponding author
%\corres{Correspondence: benndorf@econ.uni-frankfurt.de; Tel.: +49-69-798-34806}
\corres{}
% Current address and/or shared authorship
%\firstnote{Current address: Affiliation 3} 
%\secondnote{These authors contributed equally to this work.}
% The commands \thirdnote{} till \eighthnote{} are available for further notes

% Simple summary
%\simplesumm{}

% Abstract (Do not insert blank lines, i.e. \\) 
\abstract{We experimentally analyze a lemons market with a labor-market framing. Sellers are referred to as ``workers'' and have the possibility to provide ``employers'' with costly but credible information about their ``productivity''.   Economic theory suggests that in this setup unraveling takes place and a number of different types are correctly identified in equilibrium. While we do observe a substantial degree of information disclosure, we also find that unraveling is typically not as complete as predicted by economic theory. The behavior of both workers and employers impedes unraveling in that there is too little disclosure. Workers are generally reluctant to disclose their private information, and employers enforce this behavior by bidding less competitively if workers reveal compared to the case where they conceal information. 
}

% Keywords
\keyword{asymmetric information; information disclosure; unraveling; privacy; lemons market.}

% The fields PACS, MSC, and JEL may be left empty or commented out if not applicable
%\PACS{J0101}
%\MSC{}
\JEL{C72, C90, C91}

%%%%%%%%%%%%%%%%%%%%%%%%%%%%%%%%%%%%%%%%%%
% Only for the journal Applied Sciences:
%\featuredapplication{Authors are encouraged to provide a concise description of the specific application or a potential application of the work. This section is not mandatory.}
%%%%%%%%%%%%%%%%%%%%%%%%%%%%%%%%%%%%%%%%%%

%%%%%%%%%%%%%%%%%%%%%%%%%%%%%%%%%%%%%%%%%%
% Only for the journal Data:
%\dataset{DOI number or link to the deposited data set in cases where the data set is published or set to be published separately. If the data set is submitted and will be published as a supplement to this paper in the journal Data, this field will be filled by the editors of the journal. In this case, please make sure to submit the data set as a supplement when entering your manuscript into our manuscript editorial system.}

%\datasetlicense{license under which the data set is made available (CC0, CC-BY, CC-BY-SA, CC-BY-NC, etc.)}

%%%%%%%%%%%%%%%%%%%%%%%%%%%%%%%%%%%%%%%%%%
% Only for the journal Toxins
%\keycontribution{The breakthroughs or highlights of the manuscript. Authors can write one or two sentences to describe the most important part of the paper.}

%\setcounter{secnumdepth}{4}
%%%%%%%%%%%%%%%%%%%%%%%%%%%%%%%%%%%%%%%%%%


\begin{document}


{\noindent\large\textbf{Instructions}}

\label{sec:instr}
{\parindent0pt
\textbf{Part 1 - Holt Laury}

Welcome to this experiment on decision-making!
\medskip

The experiment is separated into two parts. These instructions only cover the first part. You will get the instructions for the second part after the first part has finished. No personal data will be saved in the context of this experiment.
\medskip


In the first part of the experiment you have to decide 10 times between two lotteries. There is always an ``Option A'' and an ``Option B.'' The exact lotteries are described in the screenshot below.

\begin{figure*}[htb]
\centering
\includegraphics*[width=.9\textwidth]{hl_screen_engl-eps-converted-to.pdf}
\end{figure*}

After you have made the 10 decisions, the first part is completed. At the very end of the experiment, i.e., after the second part of the experiment has finished, the computer will randomly pick one of the 10~lotteries that will be paid. You can document your decisions on the screenshot if you want to compare your decisions to the results once they are displayed.
\medskip

At the end of the experiment the computer will generate two independent random numbers which are both equally distributed on the interval [0; 1]. If the first random number is between 0.00 and 0.10, number 1 will be paid, if it is between 0.10 and 0.20, number 2 will be paid, and so on. If the first random number is between 0.90 and 1.00, number 10 will be paid.
\medskip

The second random number decides whether you have won the higher or the lower amount of money. For example, at number 3 you will earn the higher amount if the second random number is smaller than 0.30. Otherwise you will get the lower amount of money. At the number 8 the second random number needs to be smaller than 0.80 to get the higher amount of money.

\medskip

\textbf{Control questions}

Assume your decisions were as follows:

\begin{table*}[htb]
\centering
\begin{tabular}{cc}
\textbf{No.} & \textbf{Choice} \\

1 & A\\
2 & A\\
3 & A\\
5 & B\\
6 & B\\
7 & B\\
8 & B\\
9 & B\\
10& B\\

\end{tabular}
\end{table*}

1.	Assume the first random number is 0.2748 and the second one is 0.4711.
Which number will be paid in this case and which amount would you have gained?
\medskip

2.	Suppose the first random number is 0.8456 and the second one is 0.7123.
Which number would be paid in this case and which amount would you have gained?

\medskip
\medskip

\textbf{Part 2 - Revelation game}

First, please read these instructions carefully. This experiment is anonymous. That means you will not get to know which participants you have interacted with or which participants acted in which roles during the experiment.  Please be aware that you are not allowed to talk to other participants during the experiment. If you have any questions please raise your hand and we will come to your cubicle and answer your question personally and privately.
\medskip

In this experiment the participants will act as workers and as employers. At the beginning of the experiment the computer randomly determines the role you will play.  The assignment remains constant for the duration of the experiment.
\medskip

In total, there are 18 periods in this experiment. In each period of the experiment the computer will randomly sort workers and employers into groups. One group always comprises one worker and two employers. This sorting will take place in each period. Hence, you will not be interacting with the same participants in every period.
\medskip

The workers in this experiment differ with regard to their productivity. The productivity of the worker determines the revenue of the employer who hires the worker. An employer who hires a worker with a productivity of 200 will earn 200 ECU. From this revenue the employer has to pay a wage to the worker, but this will be explained at a later stage.
\medskip

Moreover, there are three different labor markets which are played on a rotating basis: Market A, Market B, and Market C. At the beginning of each period your screen will display the labor market to be played in the corresponding period. The labor markets differ in the possible productivities of the workers.
\medskip

In the Table  S1 you can see the different labor markets in the experiment. Assume Labor Market B is played in this period. As a consequence, in this period a worker can have either of the following productivities of 200, 448, 510, 551, 582 or 607. All six possible productivities are equally likely. The computer will randomly determine the productivities of the workers in this period by making a random draw from this set. Note that in all periods, each possible productivity will be attributed to exactly one worker.
\medskip

\begin{table}[H]
\centering
\caption{Productivities in the three labor markets.}
\begin{tabular}{lccc}
\toprule
 & \textbf{Labor market A} & \textbf{Labor market B} & \textbf{Labor market C} \\\hline
Possibility 1 & 200 & 200 & 200 \\
Possibility 2 & 210 & 448 & 280 \\
Possibility 3 & 230 & 510 & 360 \\
Possibility 4 & 260 & 551 & 440 \\
Possibility 5 & 300 & 582 & 520 \\
Possibility 6 & 600 & 607 & 600 \\\hline
Average & 300 & 483 & 400 \\\bottomrule

\end{tabular}

\end{table}


Every participant will begin the experiment with a starting capital of 1600 ECU. This starting capital simultaneously serves as the show-up fee, which is the amount of money you receive independent of behavior during the experiment---simply for arriving at the lab on time.

\medskip

Your task:

Each period has three stages where decisions need to be made: In the first stage workers have to decide, then the employers need to make a decision, and finally workers need to decide again. At the end of a period everybody receives a summary of the outcome of that period.

\medskip

First decision of the workers: Certificate

At the beginning, workers are given their individual productivities. The employers do NOT, however, get to know the productivities of the workers, they only know which labor market (A, B, C) is being played in that period.
\medskip

Each worker has to make the following decision in every period of the experiment: she needs to decide whether or not she would like to buy a certificate at a price of 100 ECU. The certificate reveals your productivity. That means, if you decide to purchase the certificate the employers will get to know your productivity in this period.  If you do not buy a certificate, the employers only know which labor market is being played in this period and thus only know the six possible values your productivity can take this round. If you decide to buy the certificate you will have to pay the price of 100 ECU from the wage paid to you by one of the employers.

\medskip

Decision of the employer: Making a wage offer

As an employer you receive an endowment of 200 ECU each period. Beyond that you have to make a wage offer to the worker in your group. If the worker bought the certificate for 100 ECU you will get to know her productivity in this period. If the worker did not buy the certificate you will only know the six possible values the productivity can have in this period. Your wage offer needs to be at least 0 ECU and at most 800 ECU. Note that wage offers may comprise up to two decimal places.

\medskip

Second decision of the worker: Accepting a wage offer

In the third stage the workers get to know the wage offers they received from the two employers in their group and have to accept one of the two offers. The employer, whose wage offer is accepted, will then hire the worker. She receives the productivity of the worker as a revenue but also has to pay the wage she offered to the worker. The other employer does not hire the worker. She therefore does not get a revenue and does not have to pay a wage. The worker receives the offer she accepted as wage payment. Depending on whether or not she has bought the certificate, she may still have to pay the costs of the certificate (100 ECU). Table S2 summarizes this profit calculation.

\begin{table}[H]
\centering
\caption{Profit calculation.}
\begin{tabular}{llll}
\toprule

	\multirow{2}{*}{Worker without  certificate}           & \multirow{2}{*}{Worker with certificate} & Employer whose   bid   & Employer whose    bid    \\
	 &  &is accepted &  is not accepted\\\hline
	Wage  & Wage   & $200$ & $200$                  \\
& -- 100 ECU         & + Productivity &  \\
& & -- Wage &                  \\
\bottomrule
\end{tabular}
\end{table}


Example:
Consider the following example.  A worker and employers 1 and 2 form a group. The worker has a productivity of 300, the wage offer of employer 1 is 240 ECU and the wage offer of employer 2 is 250 ECU. Assume the worker accepts the wage offer of the second employer.
\medskip

In this case Employer 1 earns only the basic amount of 200 ECU in this period. The worker earns 150 ECU (250 ECU wage minus 100 ECU certificate) in case she bought the certificate and 250 ECU otherwise. The second employer earns in this period:
\vspace{-12pt}

\begin{align*}
&+ 200~ \text{ECU (base payment)}\\
&+ 300~ \text{ECU (productivity of the worker)}\\
&- 250~ \text{ECU (wage of the worker)}\\
&= 250~ \text{ECU}
\end{align*}


%\medskip

As previously mentioned, the experiment lasts 18 periods. At the end, the earnings you have gained during the experiment will be converted into EUR at a rate of 400 ECU = 1 EUR and you will receive the corresponding amount in cash. Furthermore, we will round up the amounts to the next 50-cent threshold. Please be aware that the displayed amount paid out includes the show-up-fee which was integrated into  the starting capital.
\medskip

We kindly ask you to wait in your cubicle until we call you to get your payment. Please ensure you bring all the documents you have received from us when you collect your payment.
\medskip

If you have any questions, please raise your hand now!
\medskip


\textbf{Control Questions}

Assume that Labor Market B is played this period.

1. What is the probability that the worker in a group has a productivity of 582?

2. What is the probability that the worker in a group has a productivity of 448?

3. What is the probability that the worker in a group has a productivity of 360?

\medskip

Assume that the worker in your group has a productivity of 510.

1. What does the worker earn in this round when the accepted wage offer is 450 and she has not bought a certificate?

2. Was does the worker earn in this round when the accepted wage offer is 450 and she has bought a certificate?

3. What do the employers 1 and 2 earn, if the wage offer is 300 ECU (employer 1) or 350 ECU (employer 2) and the worker chose to accept the wage offer of employer 1?

\medskip


What information does the employer in a group have about the productivity of the worker if he has bought a certificate?

\medskip

What information does the employer in a group have about the productivity of the worker if he has not bought a certificate?

\medskip

How much is the certificate for the worker?

How much is a certificate for the employer who hires the worker?

How much is a certificate for the employer who does not hire the worker?
}

\end{document}
